# Supplementary material for: A metabolically engineered bacterium controls autoimmunity and inflammation by remodeling the pro-inflammatory microenvironment
Source: PubMed Central journal article supplement (PMC9683044; doi:10.1080/19490976.2022.2143222), 2022-11-20
Supplement: KGMI_A_2143222_SM5853.pdf [file KGMI_A_2143222_SM5853.pdf]

# Fig. S1

a

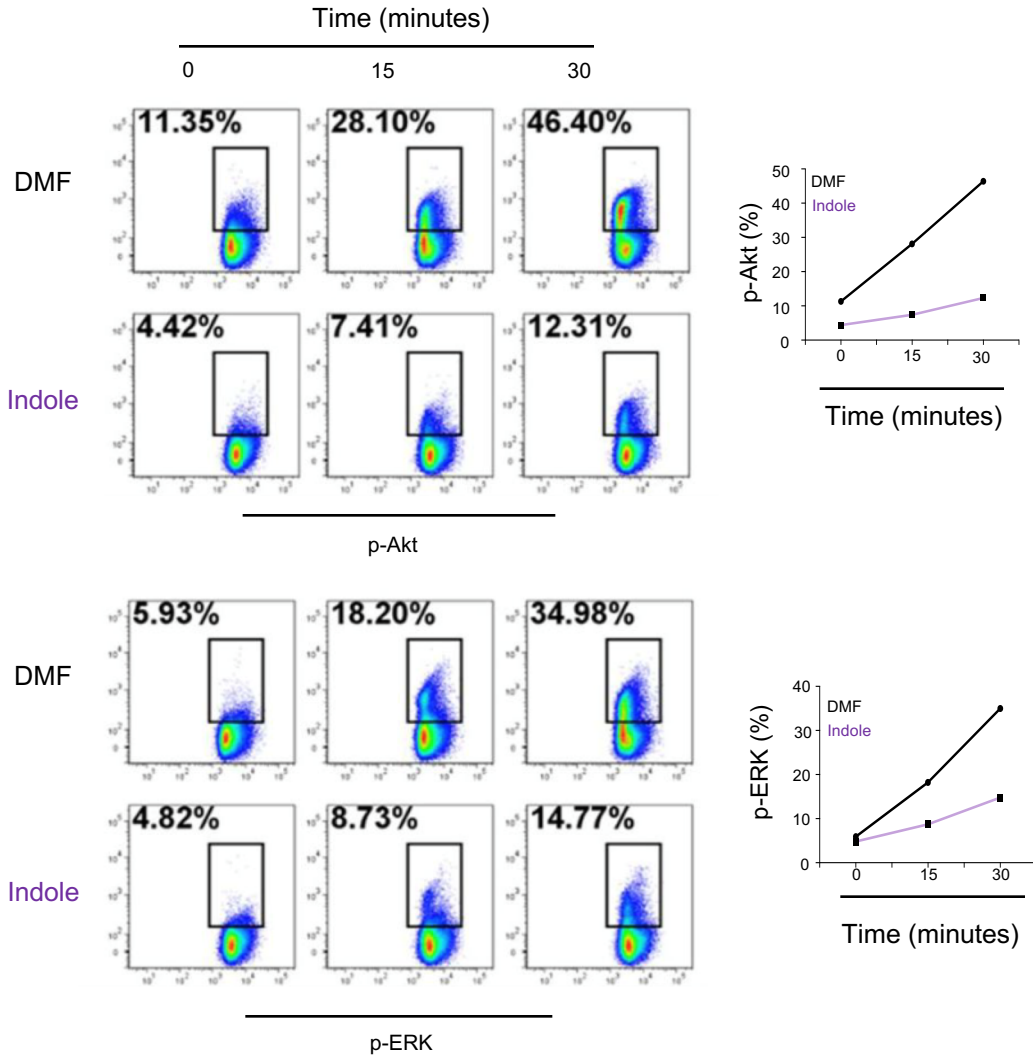

b

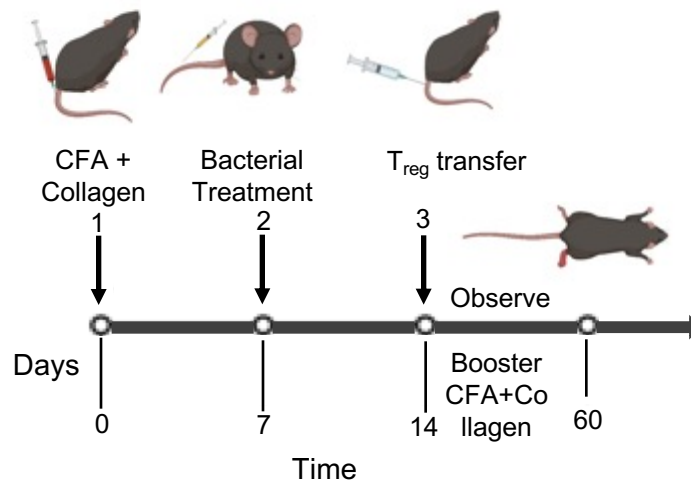

**Fig S1: Indole suppresses activation of splenic CD11b<sup>+</sup> cells by suppressing Akt and ERK signaling pathway**

**a**, Effect of indole (1mM) on the Akt and ERK signaling pathways in CD11b<sup>+</sup> cells (monocytes/macrophages) in different post incubation time. Figure depicts the flow cytometric dot-plot analysis and time-course graphical representation of phospho-Akt and phospho-ERK expression in CD11b<sup>+</sup> cells . **b**, Schematic diagram of murine CIA model used for results depicted in Fig 3c to Fig 3g. Mice were inoculated with an emulsion of CFA and collagen on Day 0 followed by bacterial treatment on Day 7 and Treg transfer on Day 14. A booster (repeat) injection of CFA + Collagen was administered to the mice on Day 21 to enhance CIA.

**Fig. S2**

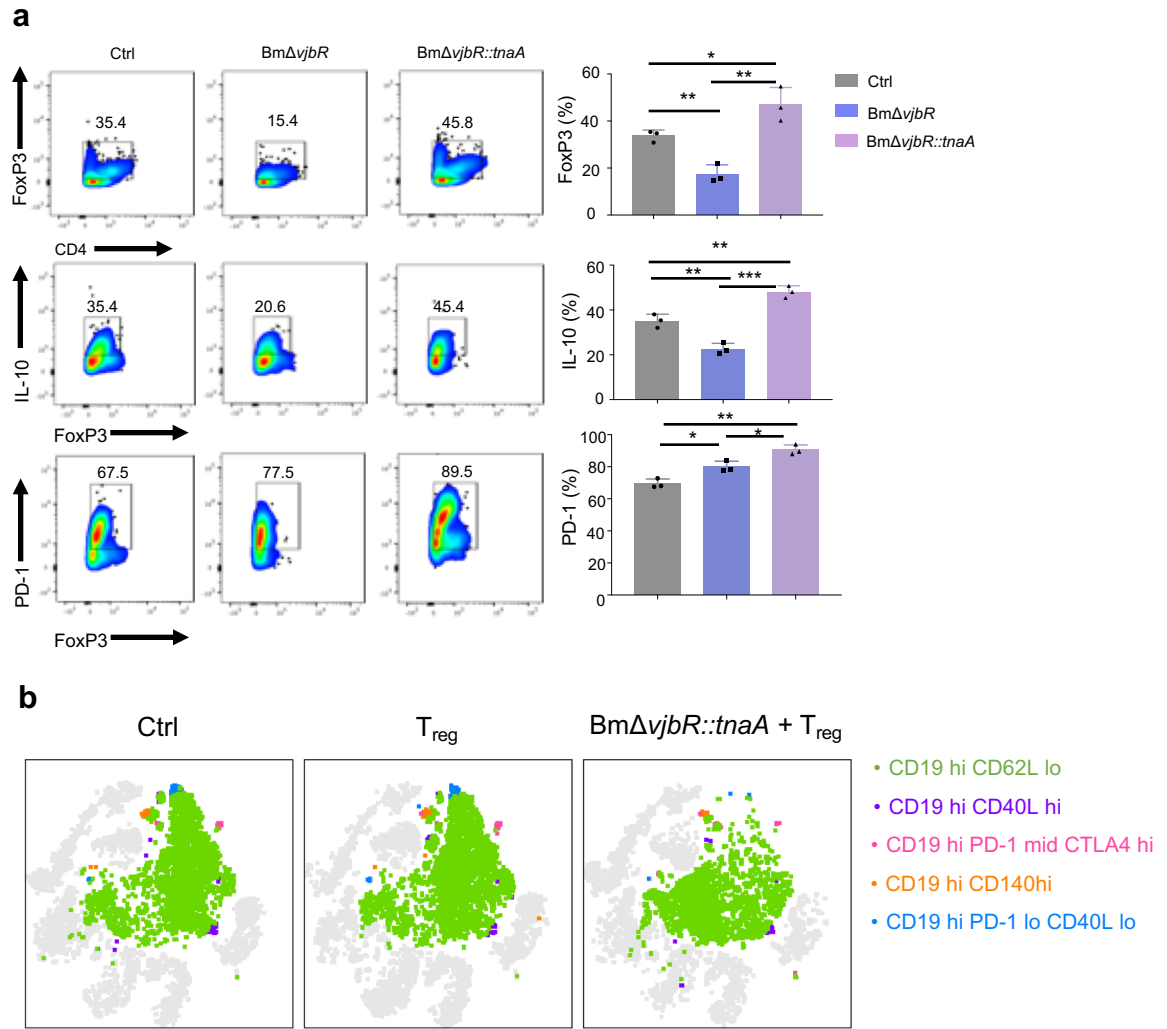

**Fig. S2: *BmΔvjbR::tnaA* activates T<sub>reg</sub> cells and modulates B-cell mediated inflammation.**

**a**, BMDMs infected with either *BmΔvjbR::tnaA* or *BmΔvjbR* were co-cultured with CD4<sup>+</sup> T cells from mouse LNs and spleen and activated by using anti-CD3/CD28 Abs. Flow cytometric dot-plot assay shows that *BmΔvjbR::tnaA* treated BMDMs greatly promoted expression of FoxP3 and PD-1 and production of IL-10 in CD4<sup>+</sup> T cells. The dot-plots are followed by graphical representation from 3 independent experiments. **b**, The CD19<sup>+</sup> population is shown in the viSNE plots. Data represent means ± SD. Student's *t*-test or Tukey's multiple comparisons test was applied for statistical analysis. \*, \*\*, \*\*\*: significance at  $p < 0.05, 0.01, 0.001$ .

**Fig. S3**

**a**

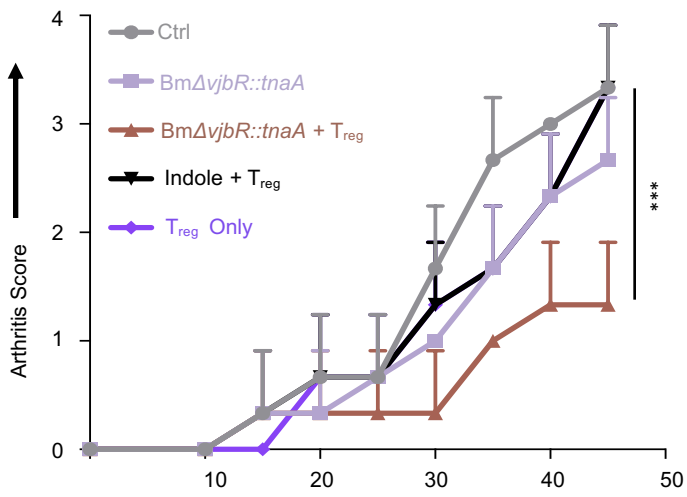

**b**

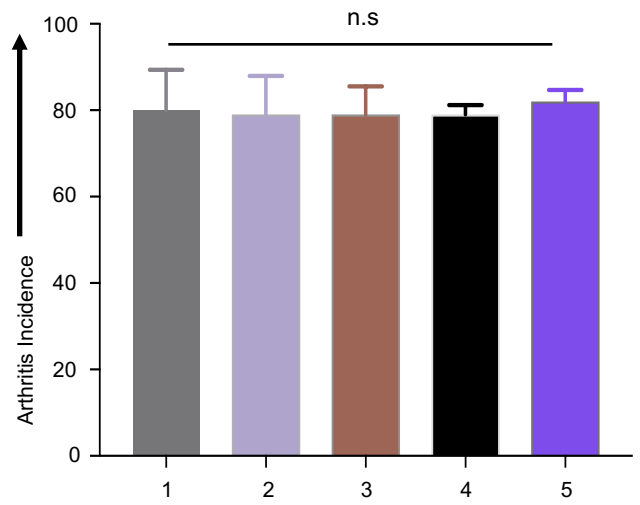

1. Ctrl 2. *BmΔvjbR::tnaA* 3. *BmΔvjbR::tnaA* + T<sub>reg</sub>  
4. Indole + T<sub>reg</sub> 5. T<sub>reg</sub> Only

**Fig. S3: Bm $\Delta$ vjbR::*tnaA* in combination with T<sub>regs</sub> delays the progression of CIA.**

**a**, Arthritis Score and **b**, arthritis incidence derived from treatment of CIA mice with indicated treatment strategies. Mice were inoculated with an emulsion of CFA and collagen on Day 0 followed by Bm $\Delta$ vjbR::*tnaA* ( $5 \times 10^7$  cfu) and/or indole treatment (20 mg/kg) on Day 21 followed by T<sub>reg</sub> cell transfer on Day 25. The T<sub>reg</sub> only group of mice received only T<sub>reg</sub> cells without any other treatment. A booster (repeat) injection of CFA + Collagen was also administered to the mice on Day 21 to enhance CIA. Data represent means  $\pm$  SD. Student's *t*-test or Tukey's multiple comparisons test was applied for statistical analysis. \*\*\*: significance at  $p < 0.001$ .

**Table S1**

| Population | Cell type                 | Ctrl   | T <sub>reg</sub> | BmΔ <i>vjbR</i><br>:: <i>tnaA</i> +<br>T <sub>reg</sub> |
|------------|---------------------------|--------|------------------|---------------------------------------------------------|
| 1          | CD40L hi CD25 lo          | 8.6 %  | 18.7 %           | 72.7 %                                                  |
| 2          | CD25 hi Tim3 hi Ki67 hi   | 34.9 % | 20.4 %           | 44.7 %                                                  |
| 3          | D45 lo CD44 mid           | 34.7 % | 22.2 %           | 43.1 %                                                  |
| 4          | CD45 lo CD44 lo           | 34.3 % | 27.9 %           | 37.8 %                                                  |
| 5          | CD44 hi CD160 mid         | 28.0 % | 36.0 %           | 36.0 %                                                  |
| 6          | CD3 hi CD8hi CD25 lo      | 31.8 % | 33.3 %           | 34.9 %                                                  |
| 7          | CD19 hi CD62L lo          | 32.7 % | 33.6 %           | 33.7 %                                                  |
| 8          | CD4 hi CD25 lo            | 31.9 % | 36.8 %           | 31.3 %                                                  |
| 9          | CD4 hi CD25 mid CTLA4 lo  | 37.0 % | 32.0 %           | 31.0 %                                                  |
| 10         | CD25 hi PD-L1 hi          | 47.1 % | 22.9 %           | 30.0 %                                                  |
| 11         | CD8 hi CD62L lo           | 38.2 % | 32.4 %           | 29.4 %                                                  |
| 12         | CD19 hi CD40L hi          | 40.6 % | 36.7 %           | 22.7 %                                                  |
| 13         | CD19 hi PD-1 mid CTLA4 hi | 46.6 % | 32.3 %           | 21.1 %                                                  |
| 14         | CD19 hi CD40L hi          | 32.1 % | 47.4 %           | 20.5 %                                                  |
| 15         | CD25 hi CD140 hi          | 20.1 % | 60.3 %           | 19.6 %                                                  |
| 16         | CCR7 hi PD-1 lo           | 53.1 % | 28.0 %           | 18.9 %                                                  |
| 17         | CD4 mid PD-L1 hi          | 55.2 % | 29.3 %           | 15.5 %                                                  |
| 18         | CD19 hi PD-1 lo CD40L lo  | 76.0 % | 22.3 %           | 1.68 %                                                  |

**Supplementary Table 1.** A list of different immune cell types which were differentiated using the tSNE analysis and their proportion in different treatment groups.

**Table S2**

| <b>Ab</b>                | <b>Clone</b> | <b>Fluorophore</b>   | <b>Source</b>            |
|--------------------------|--------------|----------------------|--------------------------|
| <b>Ghost Dye Red 710</b> |              | Ghost Dye Red 710    | Tonbo Biosciences        |
| <b>CD45</b>              | 30-F11       | FITC                 | Tonbo Biosciences        |
| <b>CD8a</b>              | 53-6.7       | BUV395               | BD Biosciences           |
| <b>CD4</b>               | GK1.5        | eFluor 450           | Thermo Fisher Scientific |
| <b>CD3</b>               | 17A2         | APC-Fire 810         | BioLegend                |
| <b>CD19</b>              | 1D3          | BUV805               | BD Biosciences           |
| <b>MHC II</b>            | M5/114.15.2  | Violet Fluor 500     | Tonbo Biosciences        |
| <b>CD160</b>             | 7H1          | APC                  | BioLegend                |
| <b>PD-L1</b>             | MIH5         | Super Bright 780     | Thermo Fisher Scientific |
| <b>CTLA-4</b>            | UC10-4F10-11 | PE-Cy7               | Tonbo Biosciences        |
| <b>PD-1</b>              | 29F.1A12     | PE-Dazzle 594        | BioLegend                |
| <b>Lag-3</b>             | C9B7W        | BUV661               | BD Biosciences           |
| <b>TIM-3</b>             | 5D12/TIM-3   | Brilliant Violet 605 | BD Biosciences           |
| <b>CD44</b>              | IM7          | PerCP                | BioLegend                |
| <b>CD62L</b>             | HRL1         | BUV737               | BD Biosciences           |
| <b>Ki-67</b>             | B56          | Brilliant Violet 711 | BD Biosciences           |
| <b>CCR7</b>              | 4B12         | PE                   | BioLegend                |
| <b>CD69</b>              | H1.2F3       | BUV563               | BD Biosciences           |
| <b>CD25</b>              | PC61         | Brilliant Violet 650 | BioLegend                |
| <b>CD40L</b>             | MR1          | BB700                | BD Biosciences           |
| <b>CD28</b>              | 37.51        | BUV496               | BD Biosciences           |

**Supplementary Table 2:** List of Abs used in CyTEK assay
